# Supplementary material for: Architecting a 1T-phase material with metal NPs enriching HER kinetics in alkaline and seawater electrolytes
Source: Royal Society of Chemistry journal article supplement (doi:10.1039/d4qi00892h), 2024-01-01
Supplement: d4qi00892h1.pdf [file d4qi00892h1.pdf]

## Supporting Information

### **Architecting 1T-phase material with metal NPs enriching HER kinetics in alkaline and seawater electrolytes**

Murugesan Prasanna <sup>a</sup>, Hyo Bin Kwak <sup>a</sup>, Myung Jun Oh <sup>b</sup>, Dong Jin Yoo <sup>a,c\*</sup>

<sup>a</sup> Graduate School, Department of Energy Storage/Conversion Engineering (BK21 FOUR), Hydrogen and Fuel Cell Research Center, Jeonbuk National University, 567-Baekje-daero, Deokjin-gu, Jeonju-si, Jeollabuk-do 54896, Republic of Korea.

<sup>b</sup> Department of Carbon Composites Convergence Materials Engineering, Jeonbuk National University, 567 Baekje-daero, Deokjin-gu, Jeonju-si, Jeonbuk-do 54896, Republic of Korea.

<sup>c</sup> Department of Life Science, Jeonbuk National University, 567-Baekje-daero, Deokjin-gu, Jeonju-si, Jeollabuk-do 54896, Republic of Korea.

---

Corresponding Author E-mail: [djyoo@jbnu.ac.kr](mailto:djyoo@jbnu.ac.kr) (Prof. Dong Jin Yoo).

---

## 1. Instrumentation for material characterization

The material crystallinity, phase, atomic arrangements, and surface morphology analysis of the prepared electrocatalyst were examined via powder X-ray diffraction (XRD, X'pert-MRD, Pro Philips), 3D imaging Raman spectroscopy with NANO PHOTON, spherical aberration corrected scanning transmission microscopy (CS-TEM) and high-resolution transmission electron microscopy (HR-TEM, JEOL/ JEM-ARM 200F), and field emission scanning electron microscopy (FE-SEM, ZEISS Gemini SEM 500). The metal weight percentage were calculated through inductively coupled plasma- optical emission spectroscopy (ICP-OES) (THERMOF-KR4FB80 iCAP RQ) at the Center for University Wide Research Facilities (CURF) at Jeonbuk National University (JBNU), South Korea. The structural and elemental composition were analyzed via X-ray photoelectron spectroscopy (XPS AxisNova, Kratos, Inc.) at the Korea Basic Science Institute (KBSI) at Jeonbuk National University (JBNU), South Korea.

## 2. Electrochemical analysis

The electrochemical experiments were performed with conventional three electrode system using Gamry instrument Reference 600 (potentiostat/Galvanostat/ZRA) in seawater and 1 M KOH electrolytes. The electrochemical cell is composed with reference electrode (Ag/AgCl, KCl saturated), counter electrode (graphitic rod), and our designed electrocatalysts in working electrode. Commercial Pt 20 wt.% used for comparison in working electrode. All the materials were coated on Ni-foam (3 mg catalyst in 1×1 cm<sup>2</sup>) and Fig. S3 shows the location of seawater collection for the analysis. *Operando*-EIS was evaluated from 0.1 Hz to 100kHz with different applied potential, and the observed results were fitted through ZSimpWin software.<sup>1-3</sup> Moreover, the experimental results were measured with help of Ag/AgCl reference electrode, the resulting data was converted to reversible hydrogen electrode (RHE) with the following Nernst equation:

$$E_{RHE} = E_{Ag/AgCl} + 0.059 \times pH + E^0_{Ag/AgCl} \quad (1)$$

### 3. TOF calculation for HER

The hydrogen TOF per site of the Cu@1T-N-W NSs catalyst was derived using the following formula (2):

$$TOF \text{ per site} = \frac{\text{Total oxygen turnovers/cm}^2 \text{ geometric area}}{\text{active sites/cm}^2 \text{ geometric area}} \quad (2)$$

The total number of hydrogen turnovers was calculated according to the formula (3)

$$\begin{aligned} \# H_2 &= \left( j \frac{mA}{cm^2} \right) \left( \frac{1C}{1000 mA} \right) \left( \frac{1mol e^-}{96485 C} \right) \left( \frac{1mol H_2}{2 mol e^-} \right) \left( \frac{6.022 \times 10^{23} mol H_2}{1 mol H_2} \right) \\ &= 3.12 \times 10^{15} \frac{s}{cm^2} \text{ per } \frac{mA}{cm^2} \end{aligned} \quad (3)$$

Then, Cu and W content of the Cu@1T-N-W NSs electrocatalyst was quantified by ICP-OES analysis at about ~37.8 wt.% and 10 wt.%, respectively. Accordingly, the W content of the 1T-N-W NSs electrocatalyst is 65 wt.%. Hence, the active site density based on the Cu and W in Cu@1T-N-W NSs is:

$$\left( \frac{10}{63.5} + \frac{37.8}{183.84} \right) \times \frac{1 mmol}{100 mg} \times 3 \frac{mg}{cm^2} \times 6.022 \times 10^{20} \frac{sites}{1 mmol} = 6.56 \times 10^{18} sites cm^{-2}$$

Similarly, the 1T-N-W NSs active sites were calculated. Then, the evaluated active sites were substituted in equation (2) to find the TOF of the prepared electrocatalysts.

### 4. Electrochemically active surface area (ECSA):

The non-faradaic region from the cyclic voltammetry (CV) curve was used to calculate the ECSA value of the developed electrocatalyst with the help of double layer capacitance ( $C_{dl}$ ) at a scan rate of 10 to 50  $\text{mV s}^{-1}$ . The capacitive current was taken from the difference between the anodic current and cathodic current ( $\Delta j = j_{\text{anode}} - j_{\text{cathode}}$ ). ECSA values are directly proportional to the  $C_{dl}$  value (the  $C_{dl}$  value is double in the slope calculation) as below:<sup>4</sup>

$$ECSA = \frac{C_{dl}}{C_s} \quad (4)$$

ECSA = Electrochemical active surface area (ECSA)

$C_{dl}$  = Double layer capacitance

$C_s$  = Specific capacitance ( $0.040 \text{ mF cm}^{-2}$ )

## 5. Tafel slope mechanism

According to the Tafel slope, the alkaline and seawater medium hydrogen evolution reaction (HER) process catalyzed by Cu@1T-N-W NSs material proceeds through Volmer-Heyrovsky mechanism. The HER reaction mechanism can be expressed as:

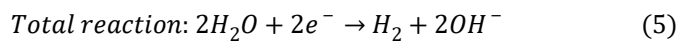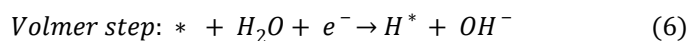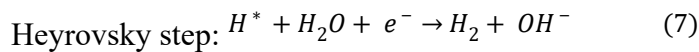

## 6. ECSA normalized LSV:

The current density normalized to the electrochemically active surface area (ECSA) was calculated according to the following equation (8),

$$J_{ECSA} = \frac{I}{S_{ECSA}} \quad (8)$$

where  $J_{\text{ECSA}}$  = current density normalized by ECSA,

$I$  = current density (mA),

$$S_{\text{ECSA}} = C_{\text{dl}}/C_s$$

## 7. Faradaic efficiency calculation using Water Displacement Method (WDM):

The Faradic efficiency of Cu@1T-N-W NSs from the overall water splitting was evaluated from the total charge passed through the system at corresponding time intervals using Faraday's law. Here, RuO<sub>2</sub> electrode was used in the anode compartment (for OER).

Using the following equation,

$$V_{Theo} = I * t * V_m / n * F \quad (9)$$

where

$V_{Theo}$  = Theoretical evolved gas volume,

$I$  = current measured in the experiment (A),

$t$  = measured time (s).

$V_m$  = volumetric molar mass of H<sub>2</sub> in l/mol,

$n$  = number of electrons,

$F$  = Faraday constant = 96485 s A/mol.

Faradaic efficiency ( $\eta F$ ) was determined by ratio of measured gas volume ( $V_{meas}$ ) and theoretically calculated volumes ( $V_{Theo}$ ) as given in equation (9),

$$\text{Faradic efficiency } (\eta F) = \frac{V_{meas}}{V_{Theo}}$$

$V_{Meas}$  = Measured evolved gas volume.

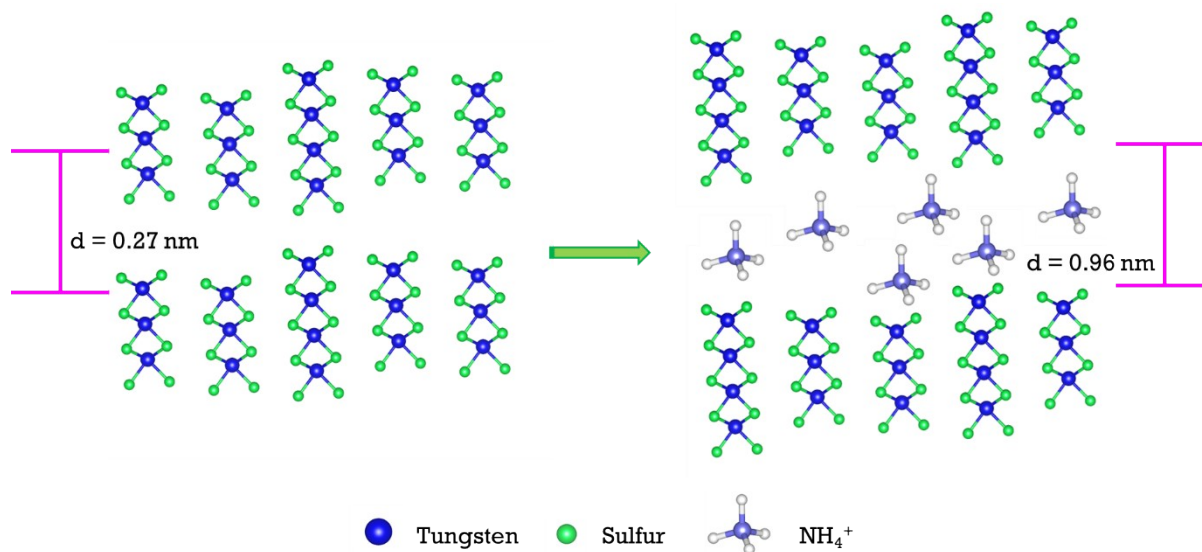

**Fig. S1.** Schematic representation of ammonium ions intercalation in 1T-N-W NSs.

Initially, the interlayer distance of 1T-WS<sub>2</sub> is 0.27 nm (Fig. S1). This distance was enlarged to 0.96 nm due to the ammonium ions intercalation ( $\text{NH}_4^+$ ), which is higher compared to 2H-WS<sub>2</sub> (0.62 nm).<sup>5</sup> According to Qin Liu, *et al.*,<sup>6</sup> the WS<sub>2</sub> was considered as four types of structural model. This consideration was established by deriving the fundamental calculations on the structural stability and the electrical properties. Here, the hydrogen atoms from  $\text{NH}_4^+$  ions directly contact the neighboring sulfur atoms in the WS<sub>2</sub> through hydrogen bonding. As a result, the interlayer distance of the 1T-WS<sub>2</sub> nanosheets were increased with phase stabilization.<sup>6</sup>



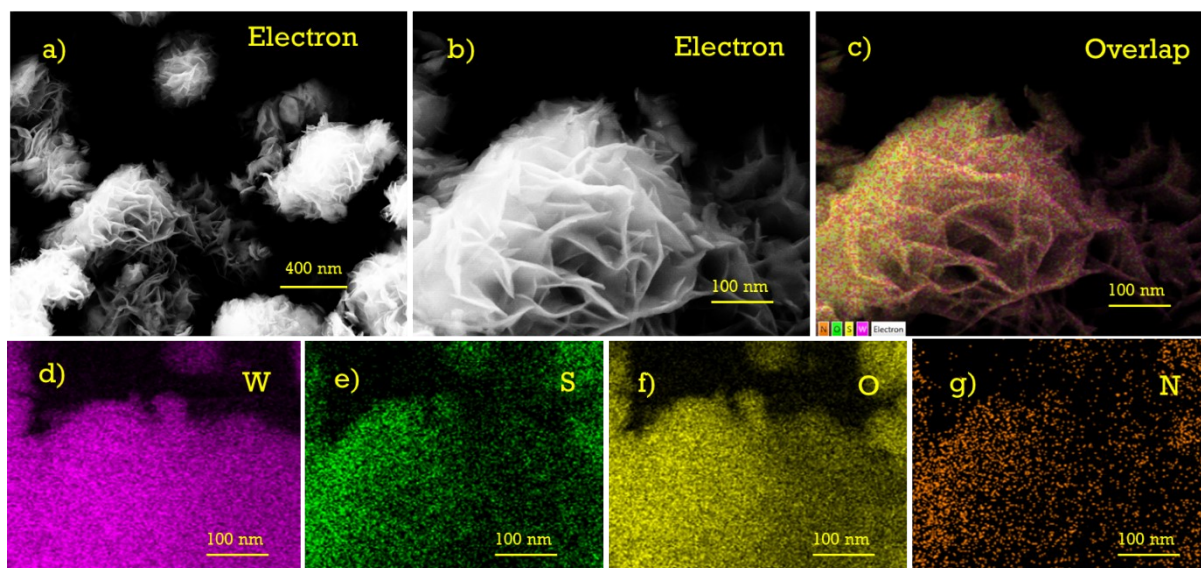

**Fig. S2.** FE-SEM images of 1T-N-W NSs: (a and b) electron images at different magnifications, (c) EDAX overlapping image, and (d-g) EDAX elemental mapping of W, S, O, and N, respectively.

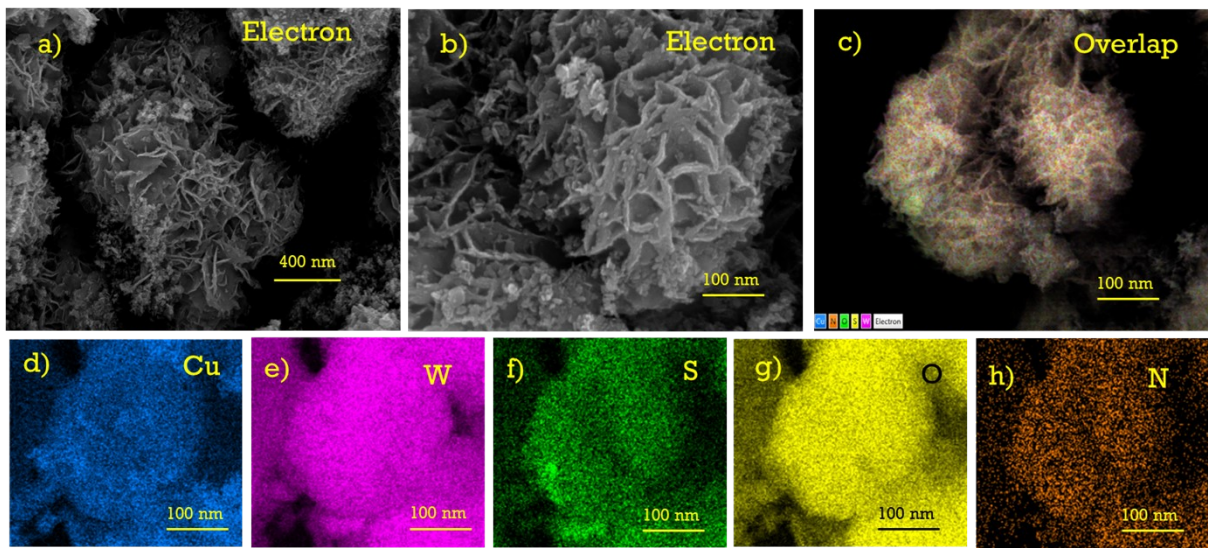

**Fig. S3.** FE-SEM images of Cu@1T-N-W NSs: (a and b) electron images at different magnifications, (c) EDAX overlapping image, and (d-h) EDAX elemental mapping of Cu, W, S, O, and N, respectively.

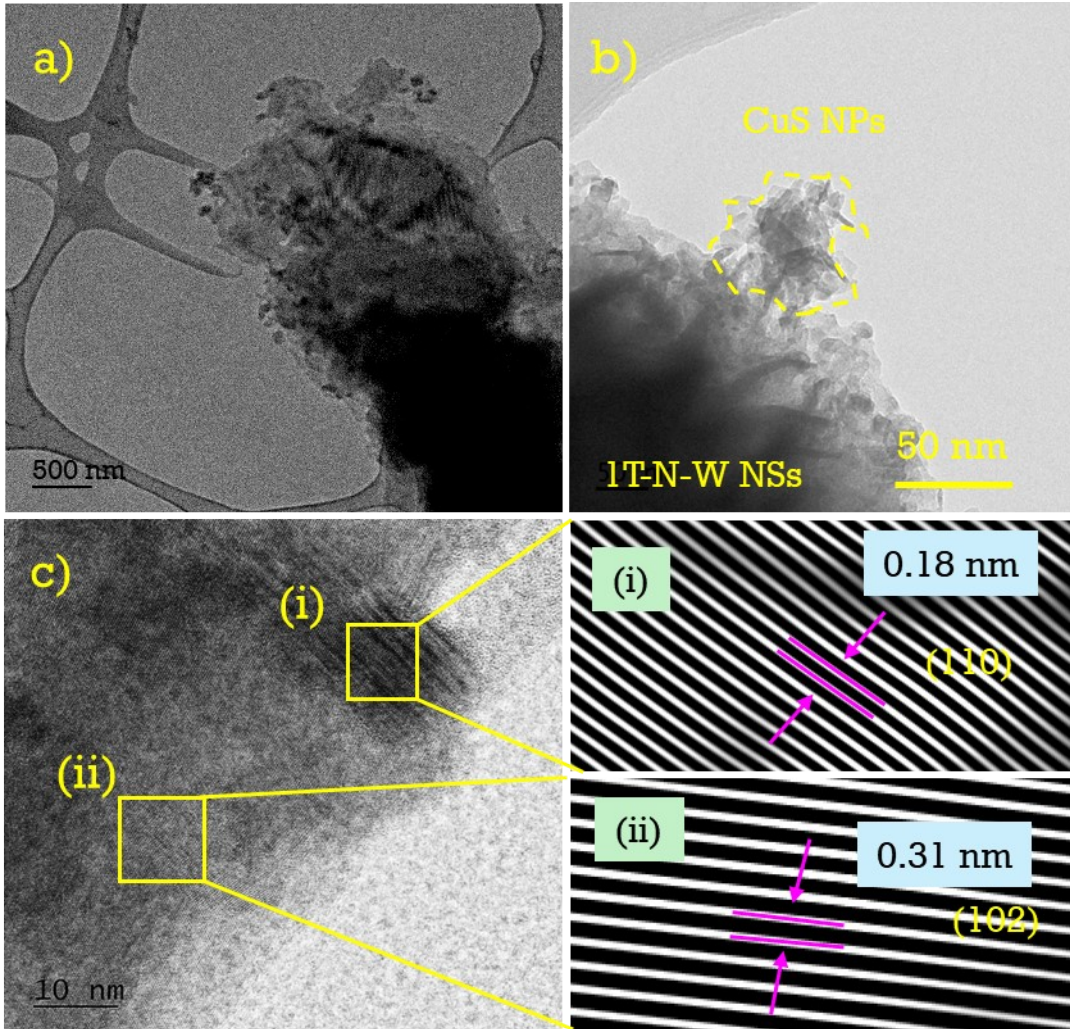

**Fig. S4.** TEM analysis of Cu@1T-N-W NSs: (a and b) CS-TEM images, (c) HR-TEM analysis.

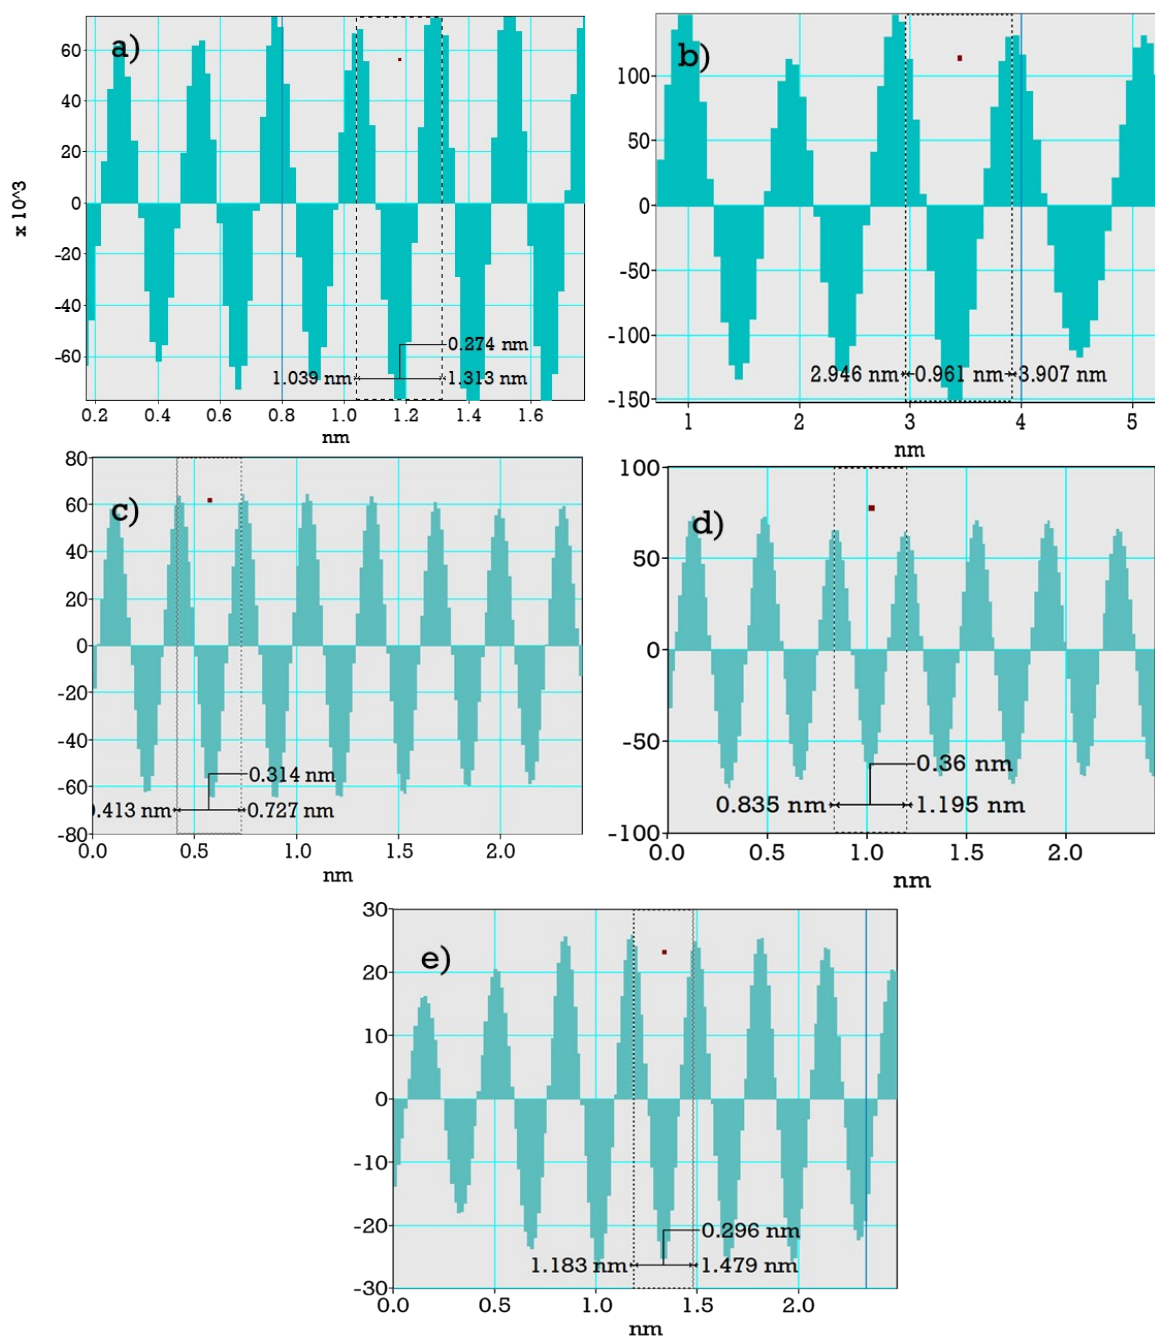

**Fig. S5.** Evidence of calculated IFFT plane distance for Cu@1T-N-W NSs and 1T-N-W NSs.

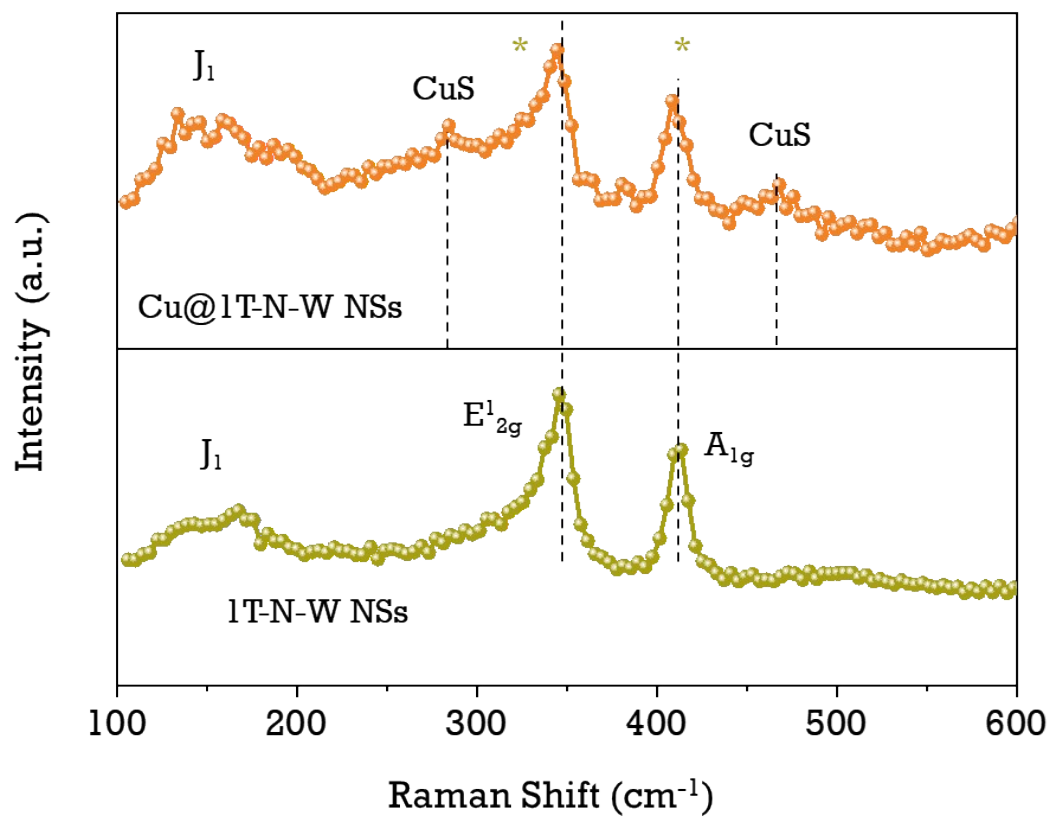

**Fig. S6.** Raman analysis of Cu@1T-N-W NSs and 1T-N-W NSs.

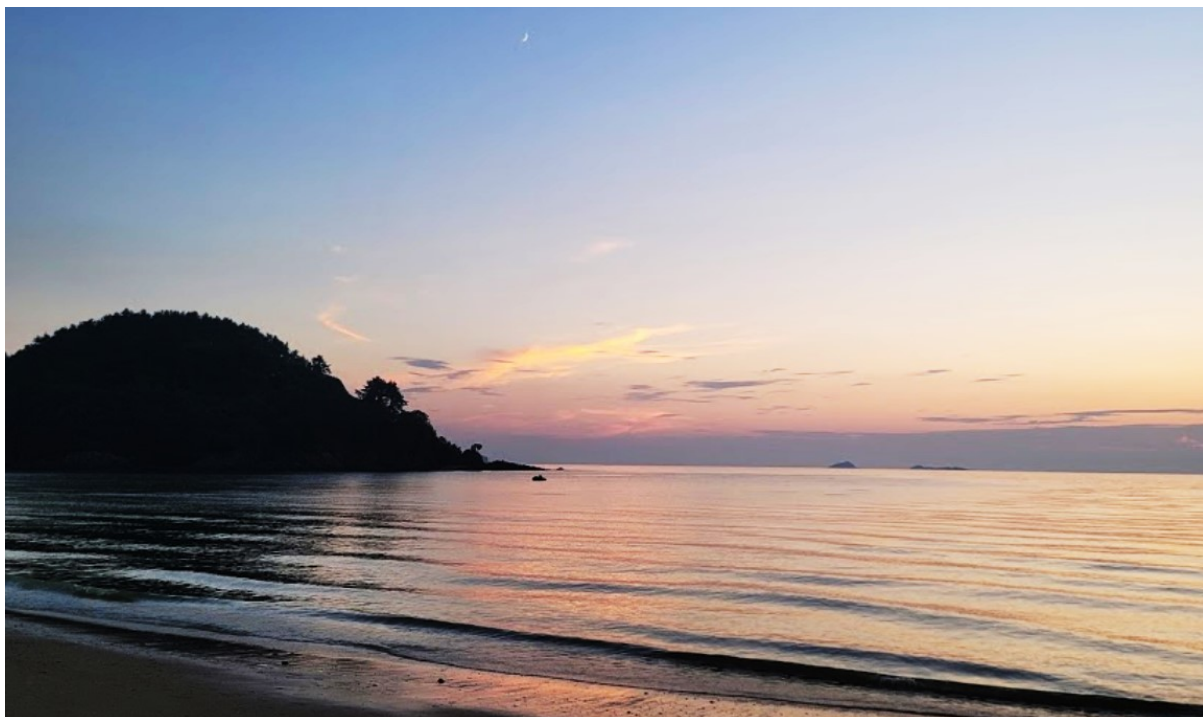

**Fig. S7.** Photographic image of the place where seawater water was collected for the experiment (Byeonsan Beach, Republic of Korea).

**Table S1:** HER overpotential at various current densities in 1 M KOH.

| Electrocatalysts     | Overpotentials         |                         |                         |
|----------------------|------------------------|-------------------------|-------------------------|
|                      | 10 mA cm <sup>-2</sup> | 100 mA cm <sup>-2</sup> | 200 mA cm <sup>-2</sup> |
| <b>Pt/C 20 wt. %</b> | 90.5                   | 151.1                   | 201.8                   |
| <b>Cu@1T-N-W NSs</b> | 121.8                  | 259.4                   | 336.2                   |
| <b>1T-N-W NSs</b>    | 180.9                  | 363.9                   | 444.5                   |

**Table S2:** HER overpotential at various current densities in natural seawater + 1 M KOH.

| Electrocatalysts     | Overpotentials         |                         |                         |
|----------------------|------------------------|-------------------------|-------------------------|
|                      | 10 mA cm <sup>-2</sup> | 100 mA cm <sup>-2</sup> | 200 mA cm <sup>-2</sup> |
| <b>Pt/C 20 wt. %</b> | 98.9                   | 200.7                   | 286.6                   |
| <b>Cu@1T-N-W NSs</b> | 158.2                  | 336.1                   | 434.3                   |
| <b>1T-N-W NSs</b>    | 234.7                  | 402.5                   | 508.1                   |

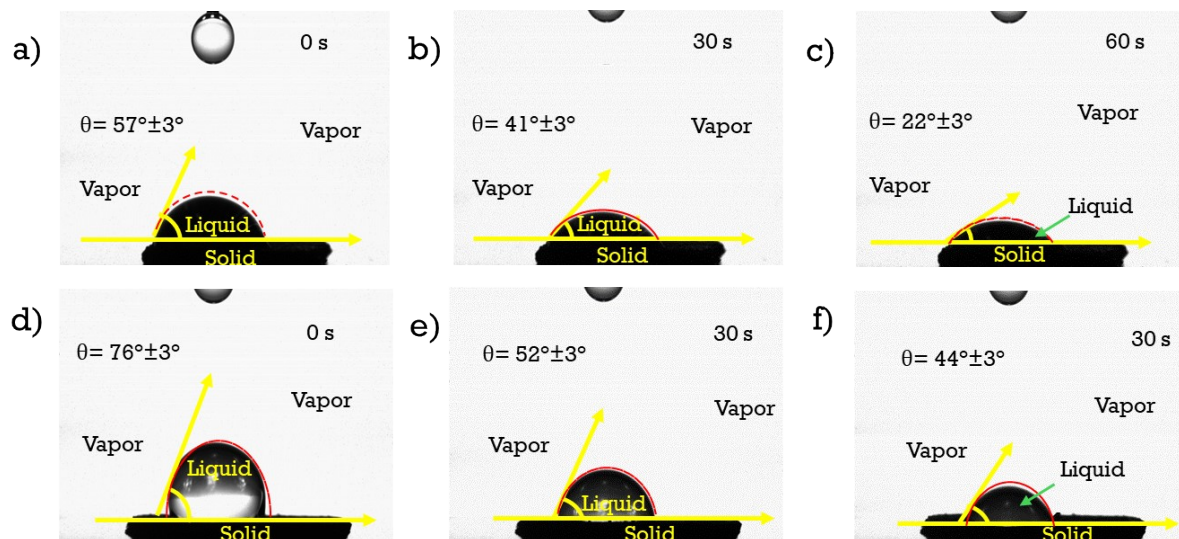

**Fig. S8.** Contact angle measurements, (a-c) water contact angle measurements of Cu@1T-N-W NSs (d-f) water contact angle measurements of Cu@1T-N-W NSs.



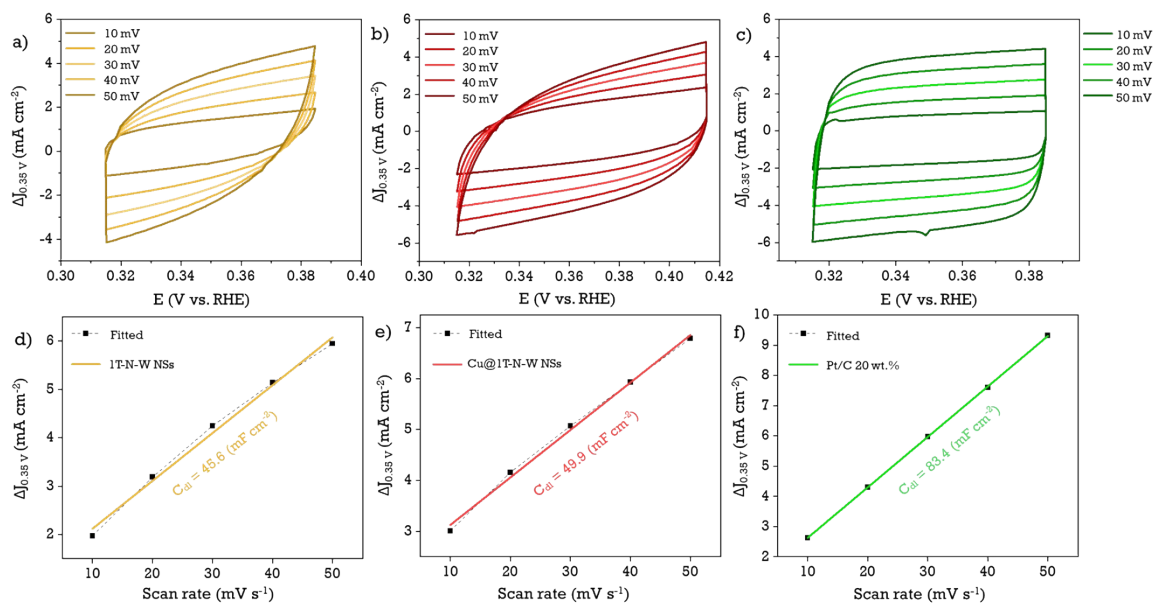

**Fig. S9.**  $C_{dl}$  and ECSA measurements in 1 M KOH solution: (a-c) CV curves at different scan rates (10 to 50 mV s<sup>-1</sup>) of 1T-N-W NSs, Cu@1T-N-W NSs, and commercial Pt 20 wt.%, respectively. (d-f) respective  $C_{dl}$  measurements.

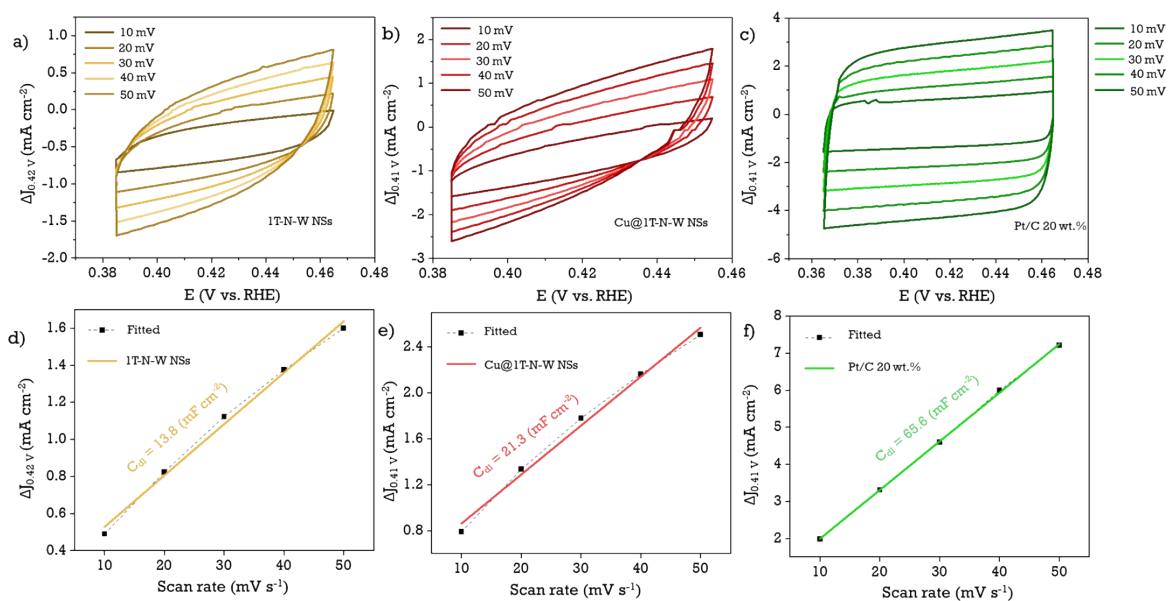

**Fig. S10.**  $C_{dl}$  and ECSA measurements in natural seawater + 1 M KOH: (a-c) CV curves at different scan rates (10 to 50 mV s<sup>-1</sup>) of 1T-N-W NSs, Cu@1T-N-W NSs, and commercial Pt 20 wt.%, respectively. (d-f) respective  $C_{dl}$  measurements.

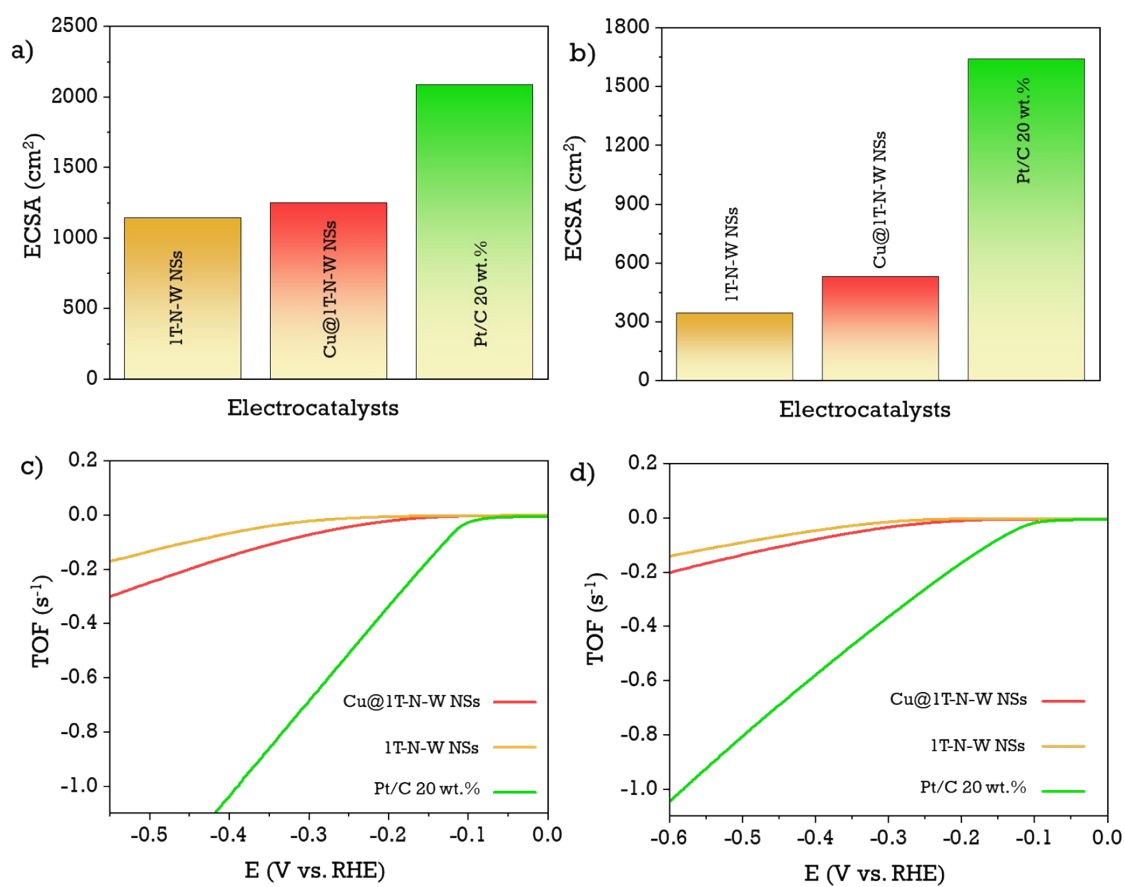

**Fig. S11.** (a and b) ECSA bar chart in 1 M KOH and natural seawater + 1 M KOH, respectively. (c-d) TOF normalized LSV curves in 1 M KOH and natural seawater + 1 M KOH, respectively.

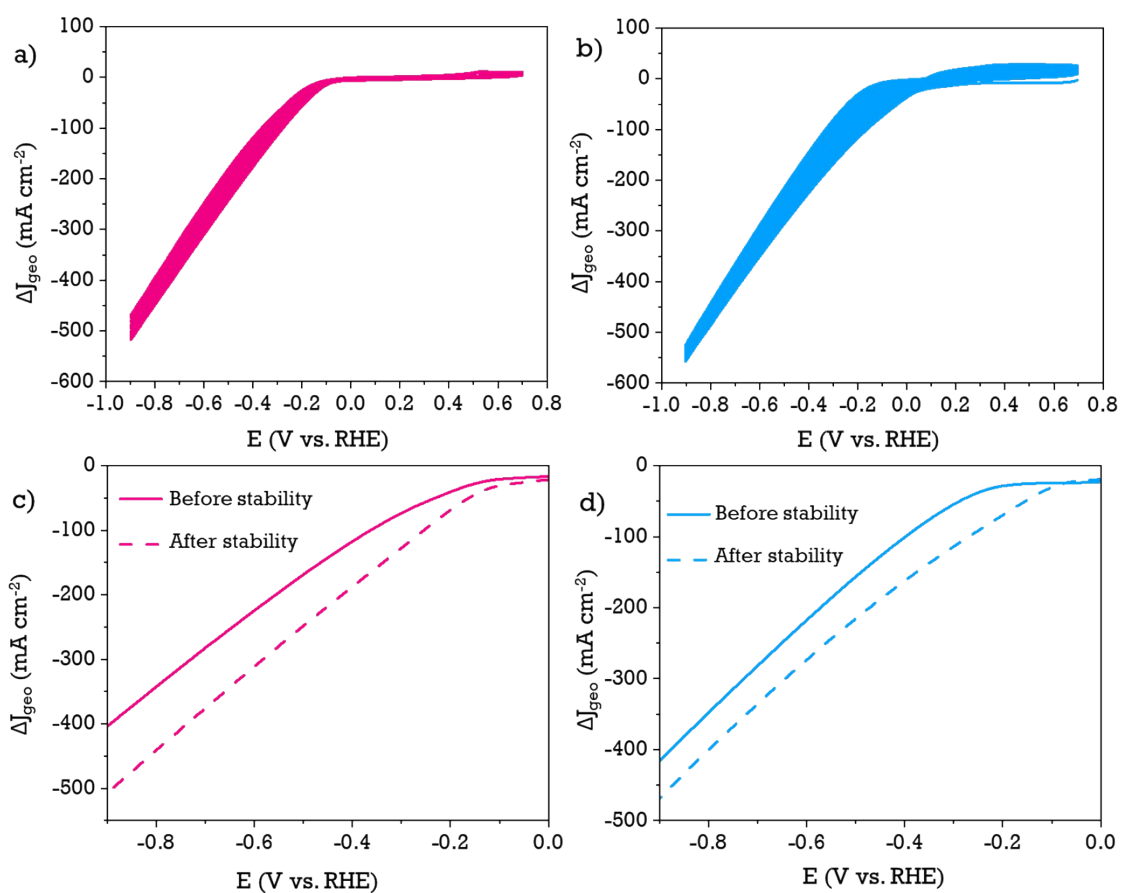

**Fig. S12.** (a and b) CV stability (1000 cycles) studies of Cu@1T-N-W NS in 1 M KOH and natural seawater + 1 M KOH electrolytes, respectively. (c and d) respective LSV curves of before and after stability.

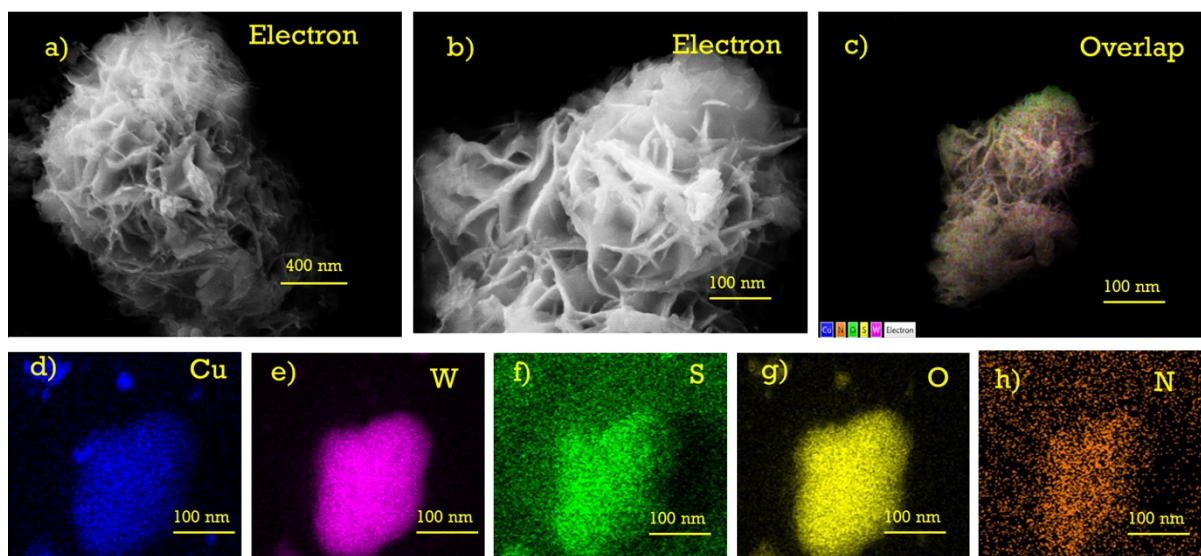

**Fig. S13.** Post-FE-SEM images of Cu@1T-N-W NSs in natural seawater + 1 M KOH: (a and b) electron images at different magnifications, (c) EDAX overlapping image, and (d-h) EDAX elemental mapping of Cu, W, S, O, and N, respectively.

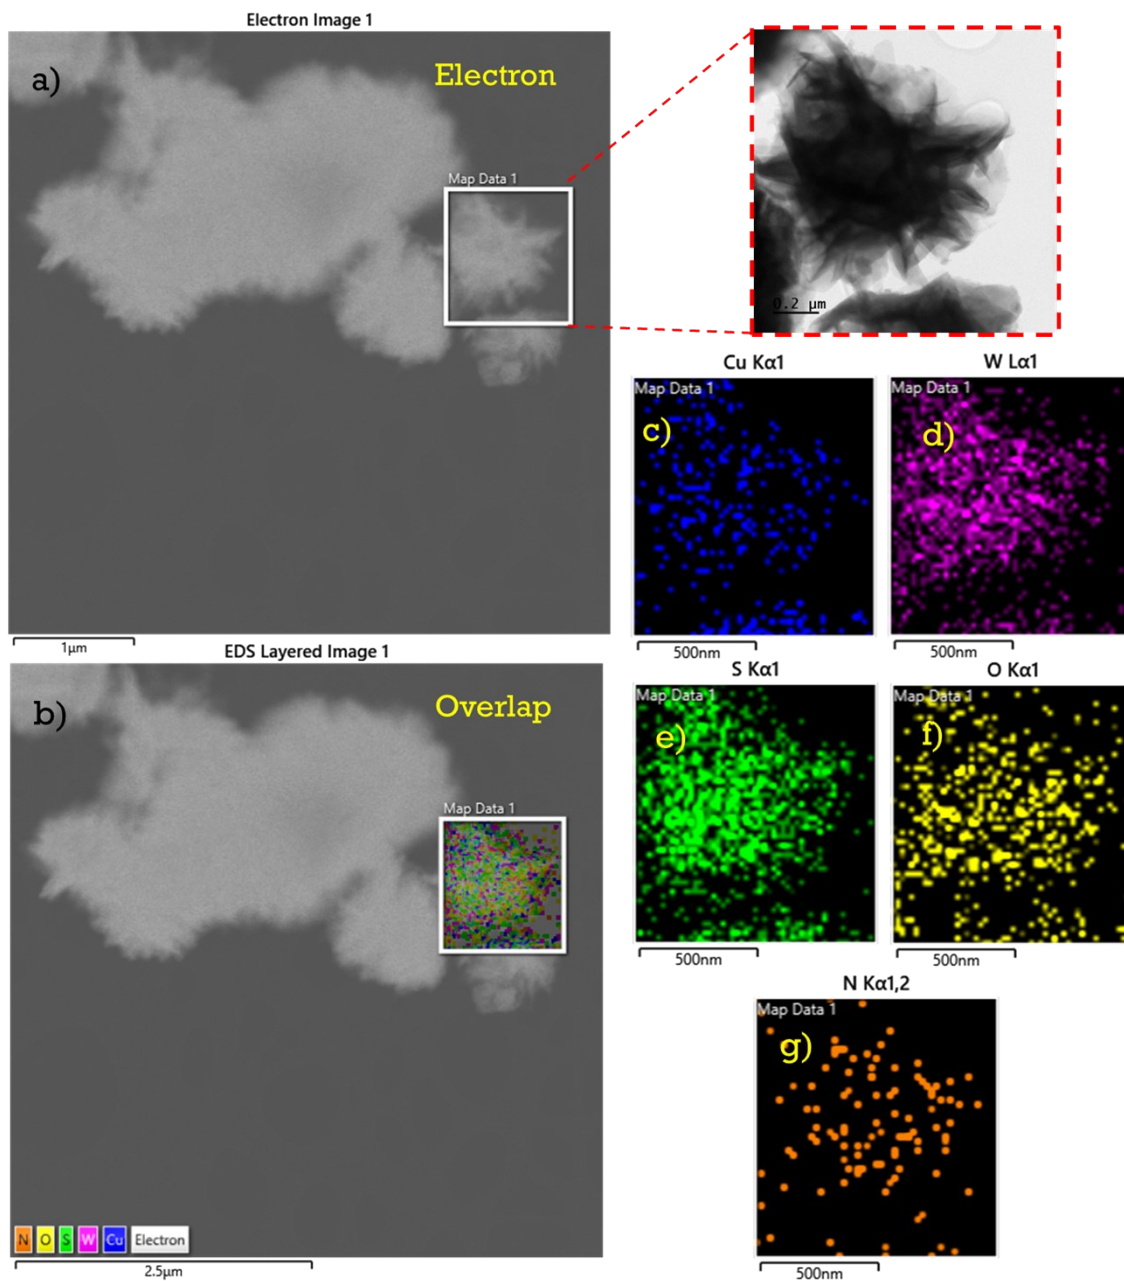

**Fig. S14.** Post-TEM images of Cu@1T-N-W NSs in natural seawater + 1 M KOH: (a) electron image, (b) HAADF-STEM overlapping image, and (c-g) HAADF-STEM elemental mapping of Cu, W, S, O, and N, respectively.

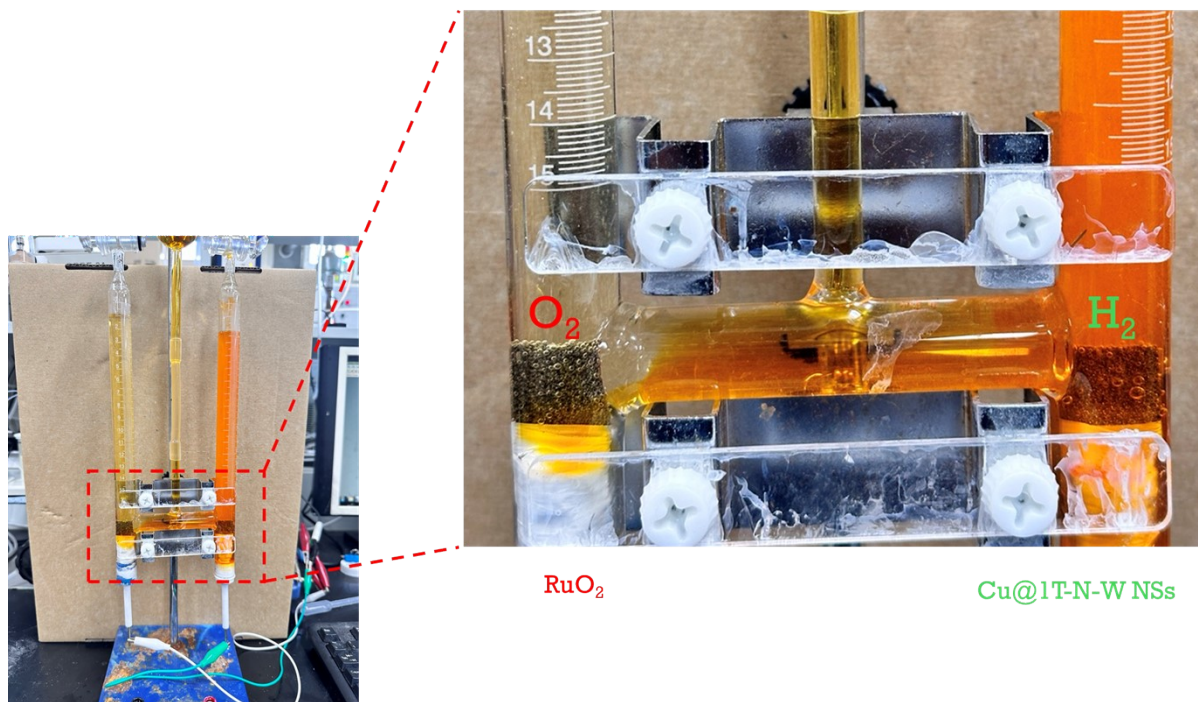

**Fig. S15.** The real-time picture of FE evaluation

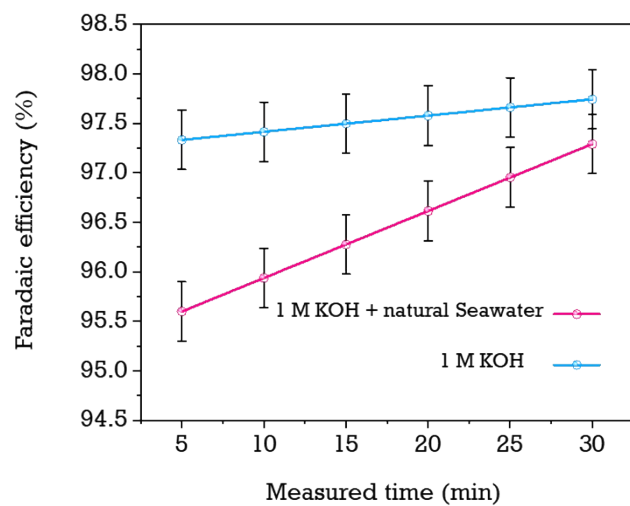

**Fig. S16.** The derived FE at different time intervals



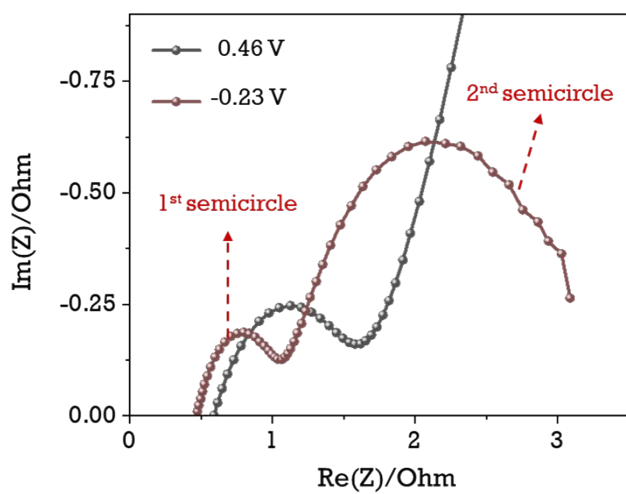

**Fig. S17.** The Nyquist spectrum of Cu@1T-N-W NSs at different potential (0.46 V is catalyst activation region and -0.23 V is HER region).

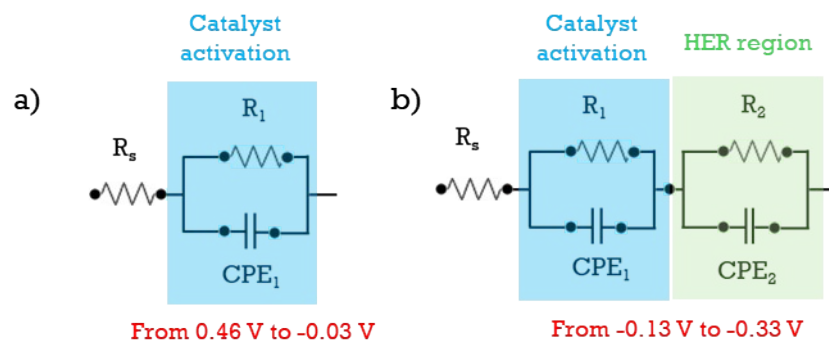

**Fig. S18.** Equivalent circuit diagram of the electrocatalysts.

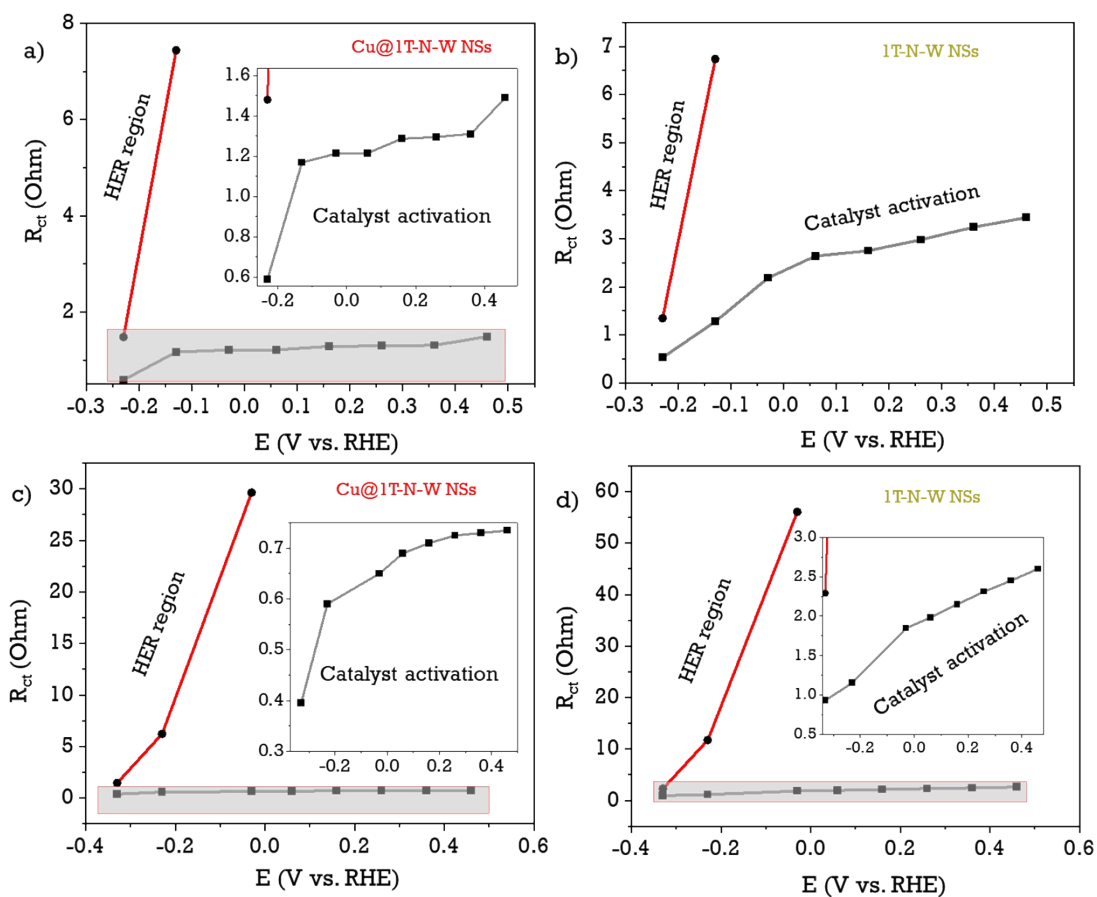

**Fig. S19.** Fitting of the  $R_{ct}$  values of Cu@1T-N-W NSs and 1T-N-W NSs in 1 M KOH and natural seawater + 1 M KOH (in different applied potentials)

**Table S3.** HER overpotentials and Tafel values of recently reported 1T-WS<sub>2</sub> based electrocatalysts.

| Electrocatalysts                                          | Electrolyte                          | Overpotential<br>@10 mA cm <sup>-2</sup><br>(mV) | Tafel values<br>(mV dec <sup>-1</sup> ) | Ref.             |
|-----------------------------------------------------------|--------------------------------------|--------------------------------------------------|-----------------------------------------|------------------|
| 1T'-D WS2                                                 | 0.5 M H <sub>2</sub> SO <sub>4</sub> | 200                                              | 50.4                                    | 7                |
| 1T-WS <sub>2</sub>                                        | 0.5 M H <sub>2</sub> SO <sub>4</sub> | 350@5 mA cm <sup>-2</sup>                        | 95                                      | 8                |
| 1T-WS <sub>2</sub>                                        | 0.5 M H <sub>2</sub> SO <sub>4</sub> | 316                                              | 110                                     | 9                |
| 1T/1T-MWH                                                 | 0.5 M H <sub>2</sub> SO <sub>4</sub> | 294                                              | 99                                      | 9                |
| V SACs@1T-WS <sub>2</sub>                                 | 0.5 M H <sub>2</sub> SO <sub>4</sub> | 185                                              | 61                                      | 10               |
| 1T-WS <sub>2</sub>                                        | 0.5 M H <sub>2</sub> SO <sub>4</sub> | 118                                              | 43                                      | 11               |
| 1T-CoWS/HMCS                                              | 0.5 M H <sub>2</sub> SO <sub>4</sub> | 25                                               | 43                                      | 12               |
| 1T-WS <sub>2</sub> NDs                                    | 0.5 M H <sub>2</sub> SO <sub>4</sub> | 180                                              | 51                                      | 13               |
| 1T-WS <sub>x</sub> _1000 BuLi                             | 0.5 M H <sub>2</sub> SO <sub>4</sub> | 242 ± 7 mV                                       | 114 ± 7                                 | 14               |
| SLHS-1T-WS <sub>2</sub>                                   | 0.5 M H <sub>2</sub> SO <sub>4</sub> | 102                                              | 46                                      | 15               |
| 1 T-WS <sub>2</sub>  P-5                                  | 1 M KOH                              | 190                                              | 92.11                                   | 16               |
| 1 T-WS <sub>2</sub>  P-5                                  | 0.5 M H <sub>2</sub> SO <sub>4</sub> | 125                                              | 73.73                                   | 16               |
| 1T'-WS <sub>2</sub> -CoCp <sub>2</sub> -<br>14%           | 0.5 M H <sub>2</sub> SO <sub>4</sub> | 170                                              | 40                                      | 17               |
| 1T'-Sn <sub>0.3</sub> W <sub>0.7</sub> S <sub>2</sub> +CB | 0.5 M H <sub>2</sub> SO <sub>4</sub> | ~ 240                                            | 81                                      | 18               |
| 1T-WS <sub>2</sub>                                        | 0.5 M H <sub>2</sub> SO <sub>4</sub> | 232                                              | 63                                      | 19               |
| 1T-Fe/P-WS <sub>2</sub> @CC                               | 1 M KOH                              | 116                                              | 65                                      | 20               |
| <b>Cu@1T-N-W NSs</b>                                      | <b>1 M KOH</b>                       | <b>121.8</b>                                     | <b>46.3</b>                             | <b>This work</b> |

**Table S4.** HER overpotentials and Tafel values of recently reported electrocatalysts in 1M KOH.

| Electrocatalysts                                         | Electrolyte    | Overpotential @10 mA cm <sup>-2</sup> (mV) | Tafel values (mV dec <sup>-1</sup> ) | Ref.             |
|----------------------------------------------------------|----------------|--------------------------------------------|--------------------------------------|------------------|
| Ni/NiO                                                   | 1.0 M KOH      | 226                                        | 135                                  | 21               |
| Ni-Mo/NG                                                 | 1.0 M KOH      | 159                                        | 45                                   | 22               |
| Ni-Cu                                                    | 1.0 M KOH      | 128 mV                                     | 57.2 mV/dec <sup>-1</sup>            | 23               |
| Co <sub>3</sub> O <sub>4</sub> -CuO                      | 1.0 M KOH      | 288                                        | 65                                   | 24               |
| CoP nanoparticles                                        | 1.0 M KOH      | 87                                         | 105                                  | 25               |
| NiMoSe/Ti <sub>3</sub> C <sub>2</sub> Tx@CC              | 1.0 M KOH      | 203                                        | 45                                   | 26               |
| Ni-Ti <sub>3</sub> C <sub>2</sub> Tx                     | 1.0 M KOH      | 181.15                                     | 56.15                                | 27               |
| FeCoMnNiSe <sub>2</sub>                                  | 1.0 M KOH      | 142                                        | 60.3                                 | 28               |
| ZnCoS-1                                                  | 1.0 M KOH      | 227                                        | 72.39                                | 29               |
| NiWO <sub>4</sub> -NiO                                   | 1.0 M KOH      | 68                                         | 155                                  | 30               |
| Co <sub>2</sub> P <sub>2</sub> O <sub>7</sub> @NC/CF-700 | 1.0 M KOH      | 145.7                                      | 92.6                                 | 31               |
| Ni-Ce-Pr-Ho                                              | 1.0 M KOH      | 78                                         | 121.6                                | 32               |
| Co <sub>2</sub> P/CoP@NF                                 | 1.0 M KOH      | 61                                         | 55.1                                 | 33               |
| MoS <sub>2</sub>  NiS MoO <sub>3</sub>                   | 1.0 M KOH      | 91                                         | 54.5                                 | 34               |
| NiSe <sub>2</sub> -A                                     | 1.0 M KOH      | 157                                        | 76                                   | 35               |
| Cu <sub>3</sub> P-Ni <sub>2</sub> P/NF                   | 1.0 M KOH      | 103                                        | 80                                   | 36               |
| <b>Cu@1T-N-W NSs</b>                                     | <b>1 M KOH</b> | <b>121.8</b>                               | <b>46.3</b>                          | <b>This work</b> |

**Table S5.** HER overpotentials and Tafel values of recently reported electrocatalysts in seawater.

| Electrocatalysts                                                                                | Electrolyte                               | Overpotential<br>@10 mA cm <sup>-2</sup><br>(mV) | Tafel values<br>(mV dec <sup>-1</sup> ) | Ref.                 |
|-------------------------------------------------------------------------------------------------|-------------------------------------------|--------------------------------------------------|-----------------------------------------|----------------------|
| Ru/FeTeO                                                                                        | 1 M KOH +<br>Seawater                     | 311 @ 3 mA cm <sup>-2</sup>                      | 61.8                                    | 37                   |
| (Rh)-WO <sub>3</sub>                                                                            | 1 M KOH +<br>Seawater                     | 98                                               | 84                                      | 38                   |
| NAU9-500                                                                                        | Artificial<br>seawater                    | 330.2                                            | 29.3                                    | 39                   |
| CoSe/MoSe <sub>2</sub>                                                                          | Artificial<br>seawater                    | 164                                              | -                                       | 40                   |
| CoSe/MoSe <sub>2</sub>                                                                          | Alkaline<br>seawater                      | 189                                              | -                                       | 40                   |
| CoMnTe <sub>2</sub> -1                                                                          | 1 M KOH +<br>Seawater                     | 136                                              | -                                       | 41                   |
| Mo <sub>3</sub> Se <sub>4</sub> -NiSe                                                           | 1 M KOH +<br>Seawater                     | 166                                              | 90.12                                   | 42                   |
| Co <sub>3</sub> (PO <sub>4</sub> ) <sub>2</sub> -MoO <sub>3-x</sub> /<br>CoMoO <sub>4</sub> /NF | 1 M KOH +<br>Seawater                     | 93                                               | 23.69                                   | 43                   |
| S-<br>Fe(OH) <sub>3</sub> /NiSe/NF                                                              | 1 M KOH +<br>Seawater                     | 349@100 mA cm <sup>-2</sup>                      | -                                       | 44                   |
| Ni <sub>2</sub> P-MoO <sub>2</sub>                                                              | 1 M KOH +<br>Seawater                     | 248                                              | -                                       | 45                   |
| <b>Cu@1T-N-W NSs</b>                                                                            | <b>1 M KOH +<br/>natural<br/>seawater</b> | <b>158.2</b>                                     | <b>58.5</b>                             | <b>This<br/>work</b> |

## References

1. Z. Wu, T. Liao, S. Wang, W. Li, B. Wijerathne, W. Hu, A. P. O'Mullane, Y. Gu and Z. Sun, Volcano relationships and a new activity descriptor of 2D transition metal–Fe layered double hydroxides for efficient oxygen evolution reaction, *Materials Horizons*, 2023, **10**, 632-645.
2. B. Ambrose, R. Madhu, K. Ramamurthy, M. Kathiresan and S. Kundu, Viologen-Cucurbit[7]uril Based Polyrotaxanated Covalent Organic Networks: A Metal Free Electrocatalyst for Oxygen Evolution Reaction, *Small*, 2024, **n/a**, 2402403.
3. A. Karmakar, D. Mahendiran, R. Madhu, P. Murugan and S. Kundu, Bypassing the scaling relationship with spin selectivity: construction of Lewis base-functionalized heterostructural 2D nanosheets for enhanced oxygen evolution reaction, *Journal of Materials Chemistry A*, 2023, **11**, 16349-16362.
4. S. Ramakrishnan, D. B. Velusamy, S. Sengodan, G. Nagaraju, D. H. Kim, A. R. Kim and D. J. Yoo, Rational design of multifunctional electrocatalyst: An approach towards efficient overall water splitting and rechargeable flexible solid-state zinc–air battery, *Applied Catalysis B: Environmental*, 2022, **300**.
5. M. Prasanna, N. Logeshwaran, S. Ramakrishnan and D. J. Yoo, Metallic 1T-N-WS<sub>2</sub>/WO<sub>3</sub> Heterojunctions Featuring Interface-Engineered Cu–S Configuration for Selective Electrochemical CO<sub>2</sub> Reduction Reaction, *Small*, 2024, **20**, 2306165.
6. Q. Liu, X. Li, Z. Xiao, Y. Zhou, H. Chen, A. Khalil, T. Xiang, J. Xu, W. Chu, X. Wu, J. Yang, C. Wang, Y. Xiong, C. Jin, P. M. Ajayan and L. Song, Stable Metallic 1T-WS<sub>2</sub> Nanoribbons Intercalated with Ammonia Ions: The Correlation between Structure and Electrical/Optical Properties, *Advanced Materials*, 2015, **27**, 4837-4844.
7. Z. Liu, N. Li, C. Su, H. Zhao, L. Xu, Z. Yin, J. Li and Y. Du, Colloidal synthesis of 1T' phase dominated WS<sub>2</sub> towards durable electrocatalysis, *Nano Energy*, 2018, **50**, 176-181.
8. H. U. Kim, V. Kanade, M. Kim, K. S. Kim, B. S. An, H. Seok, H. Yoo, L. E. Chaney, S. I. Kim, C. W. Yang, G. Y. Yeom, D. Whang, J. H. Lee and T. Kim, Wafer-Scale and Low-Temperature Growth of 1T-WS<sub>2</sub> Film for Efficient and Stable Hydrogen Evolution Reaction, *Small*, 2020, **16**, e1905000.
9. H. Seok, M. Kim, J. Cho, E. Kim, S. Son, K.-W. Kim, J. K. Kim, P. J. Yoo, M. Kim, H.-U. Kim and T. Kim, Tailoring Polymorphic Heterostructures of MoS<sub>2</sub>–WS<sub>2</sub> (1T/1T, 2H/2H) for Efficient Hydrogen Evolution Reaction, *ACS Sustainable Chemistry & Engineering*, 2023, **11**, 568-577.
10. A. Han, X. Zhou, X. Wang, S. Liu, Q. Xiong, Q. Zhang, L. Gu, Z. Zhuang, W. Zhang, F. Li, D. Wang, L. J. Li and Y. Li, One-step synthesis of single-site vanadium substitution in 1T-WS<sub>2</sub> monolayers for enhanced hydrogen evolution catalysis, *Nat Commun*, 2021, **12**, 709.
11. Q. He, L. Wang, K. Yin and S. Luo, Vertically Aligned Ultrathin 1T-WS(2) Nanosheets Enhanced the Electrocatalytic Hydrogen Evolution, *Nanoscale Res Lett*, 2018, **13**, 167.
12. C. Yue, F. Sun, N. Liu, Y. Liu, W. Bao, X. Zhang, C. Zhang, S. Ma, Y. Zhou, C. Feng and Y. Lu, High phase purity of stable 1T-phase Co-doped WS<sub>2</sub> for full pH hydrogen evolution reaction in water and seawater, *Fuel*, 2024, **357**, 129668.
13. X. Zhao, X. Ma, J. Sun, D. Li and X. Yang, Enhanced Catalytic Activities of Surfactant-Assisted Exfoliated WS<sub>2</sub> Nanodots for Hydrogen Evolution, *ACS Nano*, 2016, **10**, 2159-2166.

14. M. P. Browne, F. Novotný, C. L. Manzanares Palenzuela, J. Šturala, Z. Sofer and M. Pumera, 2H and 2H/1T-Transition Metal Dichalcogenide Films Prepared via Powderless Gas Deposition for the Hydrogen Evolution Reaction, *ACS Sustainable Chemistry & Engineering*, 2019, **7**, 16440-16449.
15. B. Li, K. Nie, Y. Zhang, L. Yi, Y. Yuan, S. Chong, Z. Liu and W. Huang, Engineering Single-Layer Hollow Structure of Transition Metal Dichalcogenides with High 1T-Phase Purity for Hydrogen Evolution Reaction, *Advanced Materials*, 2023, **35**, 2303285.
16. L. Sun, M. Gao, Z. Jing, Z. Cheng, D. Zheng, H. Xu, Q. Zhou and J. Lin, 1 T-Phase Enriched P doped WS<sub>2</sub> nanosphere for highly efficient electrochemical hydrogen evolution reaction, *Chemical Engineering Journal*, 2022, **429**, 132187.
17. I. H. Kwak, H. G. Abbas, I. S. Kwon, Y. C. Park, J. Seo, M. K. Cho, J.-P. Ahn, H. W. Seo, J. Park and H. S. Kang, Intercalation of cobaltocene into WS<sub>2</sub> nanosheets for enhanced catalytic hydrogen evolution reaction, *Journal of Materials Chemistry A*, 2019, **7**, 8101-8106.
18. G. Shao, X.-X. Xue, B. Wu, Y.-C. Lin, M. Ouzounian, T. S. Hu, Y. Xu, X. Liu, S. Li, K. Suenaga, Y. Feng and S. Liu, Template-Assisted Synthesis of Metallic 1T'-Sn<sub>0.3</sub>W<sub>0.7</sub>S<sub>2</sub> Nanosheets for Hydrogen Evolution Reaction, *Advanced Functional Materials*, 2020, **30**, 1906069.
19. C. Tan, Z. Luo, A. Chaturvedi, Y. Cai, Y. Du, Y. Gong, Y. Huang, Z. Lai, X. Zhang, L. Zheng, X. Qi, M. H. Goh, J. Wang, S. Han, X.-J. Wu, L. Gu, C. Kloc and H. Zhang, Preparation of High-Percentage 1T-Phase Transition Metal Dichalcogenide Nanodots for Electrochemical Hydrogen Evolution, *Advanced Materials*, 2018, **30**, 1705509.
20. D. R. Paudel, U. N. Pan, T. I. Singh, C. C. Gudal, N. H. Kim and J. H. Lee, Fe and P Doped 1T-Phase Enriched WS<sub>2</sub>D-Dendritic Nanostructures for Efficient Overall Water Splitting, *Applied Catalysis B: Environmental*, 2021, **286**, 119897.
21. A. Y. Faid, A. O. Barnett, F. Seland and S. Sunde, Ni/NiO nanosheets for alkaline hydrogen evolution reaction: In situ electrochemical-Raman study, *Electrochimica Acta*, 2020, **361**, 137040.
22. S. Xue, W. Zhang, Q. Zhang, J. Du, H.-M. Cheng and W. Ren, Heterostructured Ni-Mo-N nanoparticles decorated on reduced graphene oxide as efficient and robust electrocatalyst for hydrogen evolution reaction, *Carbon*, 2020, **165**, 122-128.
23. M. Y. Gao, C. Yang, Q. B. Zhang, Y. W. Yu, Y. X. Hua, Y. Li and P. Dong, Electrochemical fabrication of porous Ni-Cu alloy nanosheets with high catalytic activity for hydrogen evolution, *Electrochimica Acta*, 2016, **215**, 609-616.
24. A. Tahira, Z. H. Ibupoto, M. Willander and O. Nur, Advanced Co<sub>3</sub>O<sub>4</sub>-CuO nano-composite based electrocatalyst for efficient hydrogen evolution reaction in alkaline media, *International Journal of Hydrogen Energy*, 2019, **44**, 26148-26157.
25. S. Luo, P. Hei, R. Wang, J. Yin, W. Hong, S. Liu, Z. Bai and T. Jiao, Facile synthesis of cobalt phosphide nanoparticles as highly active electrocatalysts for hydrogen evolution reaction, *Colloids and Surfaces A: Physicochemical and Engineering Aspects*, 2020, **600**, 124925.
26. M. Saquib, N. Srivastava, P. Arora and A. C. Bhosale, NiMoSe/Ti<sub>3</sub>C<sub>2</sub>T<sub>x</sub> MXene @ CC as a highly operative bifunctional electrocatalyst for hydrogen and oxygen evolution reactions in an alkaline medium, *International Journal of Hydrogen Energy*, 2024, **59**, 1132-1142.
27. K. Gothandapani, G. Tamil Selvi, R. Sofia Jennifer, V. Velmurugan, S. Pandiaraj, M. Muthuramamoorthy, S. Pitchaimuthu, V. Raghavan, A. C. Josephine Malathi, A. Alodhayb and A. Nirmala Grace, Ni-Ti<sub>3</sub>C<sub>2</sub> MXene composite derived from Ni-metal



- organic framework for electrochemical hydrogen evolution reaction in acidic and alkaline medium, *International Journal of Hydrogen Energy*, 2024, **52**, 1164-1171.
28. Z. Liu, X. Guo, T. Cui, S. Mu, Z. Ni, C. Zhang and S. Lu, Porous freestanding FeCoMnNiSe<sub>2</sub> medium-entropy bifunctional electrocatalyst for oxygen and hydrogen evolution reactions in alkaline medium, *Journal of Power Sources*, 2024, **592**, 233956.
  29. A. Prabhakaran Shyma and R. Sellappan, Synergistic performance of Zn<sup>2+</sup> incorporated bimetallic Cobalt sulfide for the hydrogen evolution reaction in an alkaline medium, *Journal of Physics and Chemistry of Solids*, 2023, **178**, 111332.
  30. A. Gaur, Krishankant, V. Pundir, T. Maruyama, C. Bera and V. Bagchi, Electronic redistribution over the active sites of NiWO<sub>4</sub>-NiO induces collegial enhancement in hydrogen evolution reaction in alkaline medium, *Journal of Colloid and Interface Science*, 2023, **641**, 82-90.
  31. Y. Han, J. Lin, H. Zhou, L. Guo and Y. Wang, Self-standing Co<sub>2</sub>P<sub>2</sub>O<sub>7</sub>@N-doped carbon/carbon foams for hydrogen evolution reaction in alkaline medium, *Diamond and Related Materials*, 2023, **135**, 109843.
  32. W. Liu, W. Tan, H. He, Y. Peng, Y. Chen and Y. Yang, One-step electrodeposition of Ni-Ce-Pr-Ho/NF as an efficient electrocatalyst for hydrogen evolution reaction in alkaline medium, *Energy*, 2022, **250**, 123831.
  33. G. Huang, W. Liang, Y. Wu, J. Li, Y. Q. Jin, H. Zeng, H. Zhang, F. Xie, J. Chen, N. Wang, Y. Jin and H. Meng, Co<sub>2</sub>P/CoP hybrid as a reversible electrocatalyst for hydrogen oxidation/evolution reactions in alkaline medium, *Journal of Catalysis*, 2020, **390**, 23-29.
  34. C. Wang, B. Tian, M. Wu and J. Wang, Revelation of the Excellent Intrinsic Activity of MoS<sub>2</sub>|NiS|MoO<sub>3</sub> Nanowires for Hydrogen Evolution Reaction in Alkaline Medium, *ACS Applied Materials & Interfaces*, 2017, **9**, 7084-7090.
  35. L. Zhai, T. W. Benedict Lo, Z.-L. Xu, J. Potter, J. Mo, X. Guo, C. C. Tang, S. C. Edman Tsang and S. P. Lau, In Situ Phase Transformation on Nickel-Based Selenides for Enhanced Hydrogen Evolution Reaction in Alkaline Medium, *ACS Energy Letters*, 2020, **5**, 2483-2491.
  36. X. Jin, J. Li, Y. Cui, X. Liu, X. Zhang, J. Yao and B. Liu, Cu<sub>3</sub>P-Ni<sub>2</sub>P Hybrid Hexagonal Nanosheet Arrays for Efficient Hydrogen Evolution Reaction in Alkaline Solution, *Inorganic Chemistry*, 2019, **58**, 11630-11635.
  37. K. Li, X. Liu, X. Wang, S. Wu, W. Li, J. Chi and L. Wang, Iron-based heterojunction activate strong metal-support interaction enabling hydrogen evolution reaction at ampere-level current density in seawater, *Nano Energy*, 2024, **123**, 109417.
  38. N.-A. Nguyen, E. Chuluunbat, T. A. Nguyen and H.-S. Choi, High electrocatalytic activity of Rh-WO<sub>3</sub> electrocatalyst for hydrogen evolution reaction under the acidic, alkaline, and alkaline-seawater electrolytes, *International Journal of Hydrogen Energy*, 2023, **48**, 32686-32698.
  39. Z. Ren, S. Wang, J. Yu, F. Mao, K. Wang and H. Wu, Cu/MoO<sub>2</sub> Schottky heterojunction derived from a new designed POMOFs in-situ as high efficient electrocatalysts for hydrogen evolution reaction in universal-pH electrolytes and seawater, *Chemical Engineering Journal*, 2023, **470**, 144107.
  40. J. Sun, J. Li, Z. Li, C. Li, G. Ren, Z. Zhang and X. Meng, Modulating the Electronic Structure on Cobalt Sites by Compatible Heterojunction Fabrication for Greatly Improved Overall Water/Seawater Electrolysis, *ACS Sustainable Chemistry & Engineering*, 2022, **10**, 9980-9990.
  41. S. C. Karthikeyan, S. Prabhakaran, R. S. Kumar, S. Ramakrishnan, A. R. Kim, D. H. Kim and D. J. Yoo, High-efficiency sustainable energy driven alkaline/seawater

- electrolysis using a novel hetero-structured non-noble bimetal telluride nanorods, *Materials Today Nano*, 2023, **24**, 100412.
42. M. B. Poudel, N. Logeshwaran, S. Prabhakaran, A. R. Kim, D. H. Kim and D. J. Yoo, Low-Cost Hydrogen Production from Alkaline/Seawater over a Single-Step Synthesis of Mo<sub>3</sub>Se<sub>4</sub>-NiSe Core-Shell Nanowire Arrays, *Advanced Materials*, 2024, **36**, 2305813.
  43. M. Yang, B. Shi, Y. Tang, H. Lu, G. Wang, S. Zhang, M. T. Sarwar, A. Tang, L. Fu, M. Wu and H. Yang, Interfacial Chemical Bond Modulation of Co<sub>3</sub>(PO<sub>4</sub>)<sub>2</sub>-MoO<sub>3-x</sub> Heterostructures for Alkaline Water/Seawater Splitting, *Inorganic Chemistry*, 2023, **62**, 2838-2847.
  44. C. Yang, X. Jiang, Y. Li, J. Zeng and H.-P. Liang, Construction of S-modified Amorphous Fe(OH)<sub>3</sub> on NiSe Nanowires as Bifunctional Electrocatalysts for Efficient Seawater Splitting, *ACS Applied Nano Materials*, 2024, **7**, 3960-3967.
  45. L. P. Phan, T. T. N. Tran, T.-K. Truong, J. Yu, H.-V. T. Nguyen, T. B. Phan, N. H. Thi Tran and N. Q. Tran, Highly Efficient and Stable Hydrogen Evolution from Natural Seawater by Boron-Doped Three-Dimensional Ni<sub>2</sub>P-MoO<sub>2</sub> Heterostructure Microrod Arrays, *The Journal of Physical Chemistry Letters*, 2023, **14**, 7264-7273.
